# Supplementary material for: Partner protections in HIV cure-related trials involving analytical treatment interruption: Updated toolkit to mitigate HIV transmission risk
Source: PubMed Central journal article supplement — J Virus Erad. 2024 Sep 11;10(3):100386. doi: 10.1016/j.jve.2024.100386 (PMC11447310; doi:10.1016/j.jve.2024.100386), 2024-09-11
Supplement: mmc1.pdf [file mmc1.pdf]

April 2024

The Advancing Clinical Therapeutics Globally (ACTG) Partner Protections toolkit has been developed by the ACTG Partner Protections Working Group (PPWG), a working group of the HIV Reservoirs and Viral Eradication (Cure) Transformative Science Group (TSG), in collaboration with the ACTG Behavioral Sciences Subcommittee (BSS).

The [ACTG](#) created the PPWG to help identify and/or create resources that could help research sites reduce the risk of unintended HIV transmission in HIV cure-related clinical trials involving analytical treatment interruptions (ATIs), controlled and closely monitored pauses of ART to evaluate the effects of an experimental treatment (intervention) that may help cure HIV.

## Purpose

This Partner Protections toolkit is offered as a resource to support research teams in their efforts to reduce the chance of unintended HIV transmission during ATIs. Investigators and research teams are invited to use whichever components they deem most relevant to specific clinical trials conducted in their communities. Investigators are free to tailor such tools to local languages, culture, literacy levels, etc. and are recommended to engage community members on the topic of partner protections.

**Intended Audience/Users** include investigators, research teams, counselors, community members, ATI participants and their sex partners as they work collaboratively to reduce the chance of unintended HIV transmission during ATI.

## Background

The HIV prevention landscape has changed greatly in the last four decades. In recent years, many people with HIV (PWH) and their sex partners have come to rely on [Treatment as Prevention \(TasP\)](#), popularly known as [Undetectable equals Untransmittable or “U = U”](#). Participation in ATI interrupts the participant’s ability to rely upon U = U to prevent HIV transmission. As a result, participants and their sex partners may need support to understand and navigate this unfamiliar situation, to initiate these now-unfamiliar disclosure discussions and to gain the skills and confidence to do so.

## Partner Protections Toolkit includes:

- Disclosure, PrEP, Safer Sex, and ATI Counseling Scripts and Checklists
- Understanding HIV Viral Load Test Results During ATI
- HIV Prevention Resources (e.g., PrEP, PEP, Risk Estimator and Reduction Tools)
- Re-Adherence to ART Counseling Post-ATI
- Counseling Guides and Related Resources
- HIV Criminalization Resources
- General ATI Information Materials
- Useful Infographics

## Access the ACTG Partner Protections Toolkit:

- ACTG-affiliated persons: [ACTG Member Site](#)
- General public: [ACTG \(actgnetwork.org\)](#)

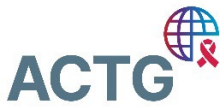

## ACTG Partner Protections Toolkit

For Questions/Comments, contact: please Karine Dubé, DrPH at [kdube@health.ucsd.edu](mailto:kdube@health.ucsd.edu)
