# Supplementary material for: Partner protections in HIV cure-related trials involving analytical treatment interruption: Updated toolkit to mitigate HIV transmission risk
Source: PubMed Central journal article supplement — J Virus Erad. 2024 Sep 11;10(3):100386. doi: 10.1016/j.jve.2024.100386 (PMC11447310; doi:10.1016/j.jve.2024.100386), 2024-09-11
Supplement: mmc5.pdf [file mmc5.pdf]

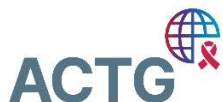

# Partner Protection Counseling: PrEP Checklist

Adapted from: Peluso, et al (2020)

|                                                                                                                                                                                                                                                                                                                                                                 |                                                                                                         |
|-----------------------------------------------------------------------------------------------------------------------------------------------------------------------------------------------------------------------------------------------------------------------------------------------------------------------------------------------------------------|---------------------------------------------------------------------------------------------------------|
| <b>Participant ID:</b>                                                                                                                                                                                                                                                                                                                                          | <b>Date:</b>                                                                                            |
| <b>Assess whether HIV status of partner(s) is known.</b>                                                                                                                                                                                                                                                                                                        | <input type="checkbox"/> Assessed <input type="checkbox"/> Not Assessed                                 |
| Initials and Comments:                                                                                                                                                                                                                                                                                                                                          |                                                                                                         |
| <b>Assess the volunteer's current understanding of HIV transmission risk to sex partner(s).</b>                                                                                                                                                                                                                                                                 | <input type="checkbox"/> Assessed <input type="checkbox"/> Not Assessed                                 |
| Initials and Comments:                                                                                                                                                                                                                                                                                                                                          |                                                                                                         |
| <b>Assess if the volunteer has other risk factors for transmitting HIV, such as sharing needles or active participation in chemsex.</b>                                                                                                                                                                                                                         | <input type="checkbox"/> Assessed<br><input type="checkbox"/> Not Assessed                              |
| Initials and Comments:                                                                                                                                                                                                                                                                                                                                          |                                                                                                         |
| <b>Describe the expected viral rebound during the ATI and the rationale for partner without HIV to use condoms, safer sex practices and/or PrEP.</b>                                                                                                                                                                                                            | <input type="checkbox"/> Reviewed<br><input type="checkbox"/> Not Reviewed                              |
| Initials and Comments:                                                                                                                                                                                                                                                                                                                                          |                                                                                                         |
| <b>Ask whether the volunteer has heard of PrEP.</b>                                                                                                                                                                                                                                                                                                             | <input type="checkbox"/> Reviewed<br><input type="checkbox"/> Not Reviewed                              |
| Initials and Comments:                                                                                                                                                                                                                                                                                                                                          |                                                                                                         |
| <b>Describe PrEP and its potential benefits.</b>                                                                                                                                                                                                                                                                                                                | <input type="checkbox"/> Reviewed<br><input type="checkbox"/> Not Reviewed                              |
| Initials and Comments:                                                                                                                                                                                                                                                                                                                                          |                                                                                                         |
| <b>Assess concerns about any negative consequences of disclosure.</b>                                                                                                                                                                                                                                                                                           | <input type="checkbox"/> Assessed<br><input type="checkbox"/> Not Assessed                              |
| Initials and Comments:                                                                                                                                                                                                                                                                                                                                          |                                                                                                         |
| <b>Provide and review the HIV Treatment Interruption Participation Disclosure Sheet.</b>                                                                                                                                                                                                                                                                        | <input type="checkbox"/> Reviewed<br><input type="checkbox"/> Not Reviewed                              |
| Initials and Comments:                                                                                                                                                                                                                                                                                                                                          |                                                                                                         |
| <b>Ask whether the participant is aware of potential HIV criminalization laws surrounding non-disclosure, exposure and/or transmission.</b><br>Ask if the participant is aware that HIV criminalization laws may be applied even in situations where there is no transmission.<br>Ask if the participant wants to learn where to access additional information. | <input type="checkbox"/> Reviewed<br><input type="checkbox"/> Not Reviewed                              |
| Initials and Comments:                                                                                                                                                                                                                                                                                                                                          |                                                                                                         |
| <b>Provide the PrEP for Partners information sheet.</b>                                                                                                                                                                                                                                                                                                         | <input type="checkbox"/> Check here if distributed                                                      |
| Initials and Comments:                                                                                                                                                                                                                                                                                                                                          |                                                                                                         |
| If cisgender female partners are involved, provide <b>Special Considerations for Cisgender Female Partners</b> supplement.                                                                                                                                                                                                                                      | <input type="checkbox"/> Check here if distributed<br><input type="checkbox"/> Does not apply           |
| Initials and Comments:                                                                                                                                                                                                                                                                                                                                          |                                                                                                         |
| <b>Review the resources for accessing PrEP provided on the information sheet.</b>                                                                                                                                                                                                                                                                               | <input type="checkbox"/> Check here if reviewed                                                         |
| Initials and Comments:                                                                                                                                                                                                                                                                                                                                          |                                                                                                         |
| <b>Offer to follow up with the volunteer and/or their partner(s) if requested to link them to services.</b>                                                                                                                                                                                                                                                     | <input type="checkbox"/> Accepts link to services<br><input type="checkbox"/> Declines link to services |
| Initials and Comments:                                                                                                                                                                                                                                                                                                                                          |                                                                                                         |
