# Supplementary material for: Partner protections in HIV cure-related trials involving analytical treatment interruption: Updated toolkit to mitigate HIV transmission risk
Source: PubMed Central journal article supplement — J Virus Erad. 2024 Sep 11;10(3):100386. doi: 10.1016/j.jve.2024.100386 (PMC11447310; doi:10.1016/j.jve.2024.100386), 2024-09-11
Supplement: mmc6.pdf [file mmc6.pdf]

|                                                                                                                                                                                                                                                                                                                                                    |                                                                                                                                |
|----------------------------------------------------------------------------------------------------------------------------------------------------------------------------------------------------------------------------------------------------------------------------------------------------------------------------------------------------|--------------------------------------------------------------------------------------------------------------------------------|
| <b>Participant ID:</b>                                                                                                                                                                                                                                                                                                                             | <b>Date:</b>                                                                                                                   |
| <b>Has volunteer previously reported any sex partner(s)?</b>                                                                                                                                                                                                                                                                                       | <input type="checkbox"/> Yes <input type="checkbox"/> No                                                                       |
| Initials and Comments:                                                                                                                                                                                                                                                                                                                             |                                                                                                                                |
| <b>Is there a protection plan for sex partner(s)?</b>                                                                                                                                                                                                                                                                                              | <input type="checkbox"/> Yes<br><input type="checkbox"/> No If no, offer shared study visit and navigation                     |
| Initials and Comments:                                                                                                                                                                                                                                                                                                                             |                                                                                                                                |
| <b>Has volunteer had new sex partner(s) since last visit and/or anticipate change in sex partner(s)?</b>                                                                                                                                                                                                                                           | <input type="checkbox"/> Yes, new partner(s)<br><input type="checkbox"/> Yes, anticipate change<br><input type="checkbox"/> No |
| <b>If yes</b> , describe type of partner(s), changes in life situations or basics needs (cis/trans male/female), context (travel, event/party, sexwork, etc.), and plans for protecting partners. Offer shared study visit and navigation assistance.                                                                                              |                                                                                                                                |
| Initials and Comments:                                                                                                                                                                                                                                                                                                                             |                                                                                                                                |
| <b>Review that viral rebound can occur at any time during the treatment interruption and may occur without any symptoms.</b>                                                                                                                                                                                                                       | <input type="checkbox"/> Reviewed<br><input type="checkbox"/> Not Reviewed                                                     |
| Initials and Comments:                                                                                                                                                                                                                                                                                                                             |                                                                                                                                |
| <b>Review the risk that viral rebound poses to sex partner(s) and the potential legal risk to participant.</b>                                                                                                                                                                                                                                     | <input type="checkbox"/> Reviewed<br><input type="checkbox"/> Not Reviewed                                                     |
| Initials and Comments:                                                                                                                                                                                                                                                                                                                             |                                                                                                                                |
| <b>Ask whether the participant is aware of the HIV criminalization laws surrounding transmission.</b><br>Ask if the participant is aware that HIV criminalization laws may be applied even in situations where there is no transmission.<br>Ask if the participant wants to discuss this or wants to learn where to access additional information. | <input type="checkbox"/> Yes<br><input type="checkbox"/> No                                                                    |
| Initials and Comments:                                                                                                                                                                                                                                                                                                                             |                                                                                                                                |
| <b>Ask whether the participants wants to leave with condoms.</b>                                                                                                                                                                                                                                                                                   | <input type="checkbox"/> Yes<br><input type="checkbox"/> No                                                                    |
| Initials and Comments:                                                                                                                                                                                                                                                                                                                             |                                                                                                                                |
| <b>Ask whether the participants wants to discuss safer sex practices with an HIV prevention counselor.</b>                                                                                                                                                                                                                                         | <input type="checkbox"/> Yes<br><input type="checkbox"/> No                                                                    |
| Initials and Comments:                                                                                                                                                                                                                                                                                                                             |                                                                                                                                |
| <b>Ask whether the participant or their sex partner(s) want to discuss PrEP with a research team member.</b>                                                                                                                                                                                                                                       | <input type="checkbox"/> Yes<br><input type="checkbox"/> No                                                                    |
| Initials and Comments:                                                                                                                                                                                                                                                                                                                             |                                                                                                                                |
| <b>If PrEP has been discussed previously, follow up on whether action has been taken by the partner(s) and whether navigation assistance is needed.</b>                                                                                                                                                                                            |                                                                                                                                |
| Initials and Comments:                                                                                                                                                                                                                                                                                                                             |                                                                                                                                |
| <b>Offer the HIV Treatment Interruption Study Participation Disclosure Sheet, PrEP for Partners, and Special Considerations for Cisgender Female Partners, as applicable.</b>                                                                                                                                                                      |                                                                                                                                |
| Initials and Comments:                                                                                                                                                                                                                                                                                                                             |                                                                                                                                |
